# Supplementary material
Source: PubMed Central journal article supplement (PMC2586812)
Supplement: NIHMS39255-supplement-1.pdf [file NIHMS39255-supplement-1.pdf]

## Full Methods

**Live cell microscopy and laser ablations.** PtKG-23 (a clone of PtK<sub>1</sub> line, constitutively expressing  $\gamma$ -tubulin/GFP<sup>1</sup>) and PtK $\alpha$ T (a clone of PtK<sub>2</sub> line, constitutively expressing  $\alpha$ -tubulin/GFP<sup>2</sup>) cells were maintained in Ham's F12 medium (Invitrogen, Carlsbad, CA) supplemented with 10% foetal calf serum at 37°C, 5% CO<sub>2</sub>. For laser microsurgery cells grown on 24x24-mm<sup>2</sup> coverslips were mounted in Rose chambers. Temperature of the chambers on the microscope stage was maintained between 35 and 37°C by a custom-built electronically-controlled stage-heater

Monastrol, synthesized as described earlier<sup>3</sup> was kept as 100-mM stock in DMSO and used at 100  $\mu$ M. Nocodazole (Sigma, Saint-Louise, MO) was kept as 10-mM stock in DMSO and used at 5  $\mu$ M. For drug washout top coverslip of the Rose chamber was removed and cells (on the bottom coverslip) were washed with 5-7 changes of full growth medium. To unambiguously identify the cell of interest its position was marked using a diamond objective-scribe (Zeiss, Thornwood, NY).

Laser ablation of centrosomes was performed as described elsewhere<sup>4,5</sup>. Note that after laser ablation and drug washout time-lapse sequences were recorded not on the laser-microsurgery microscope but on a different similarly equipped Nikon Eclipse TE2000 or TE300 microscope. This was necessary to make the laser-microsurgery workstation available for other experiments during rather lengthy periods of time-lapse recordings. Time-lapse image sequences were recorded at 30-s or 60-sec intervals.

**Immunofluorescence.** For microtubule and NuMA staining cells were fixed with 1% glutaraldehyde in PEM buffer (100-mM PIPES, 3-mM MgCl<sub>2</sub>, 5 mM EGTA, pH 6.9), permeabilized with 1% Triton X-100, and reduced with 1 mg/ml NaBH<sub>4</sub>. All reagents were purchased from Sigma. For CREST and Mad2 staining cells were fixed with 3.8% paraformaldehyde in PBS, and then permeabilized and reduced exactly as for

microtubule/NuMA staining. The following primary antibodies were used: mouse anti- $\alpha$ -tubulin (cloneDM1 $\alpha$ , Sigma-Aldrich); rabbit anti-NuMA (kind gift of Dr. Duane Compton, Dartmouth Medical School, Hanover, NH); human serum CREST SH (kind gift of Dr. Bill Brinkley (Baylor College, Houston, TX); and rabbit anti-Mad2 (BAbCO, Richmond, CA).

Fluorescence images were recorded with a 60x1.4 PlanApo lens as Z-series at 200-nm steps (detailed in reference<sup>5</sup>). They were deconvolved using SoftWorx deconvolution software (Applied Precision, Issaquah, WA) and presented as maximal intensity projections. Inter-kinetochore distances were measured in 3-D deconvolved datasets using SoftWorx.

**Electron Microscopy.** Serial-section EM analysis was conducted and surface-rendered 3-D models constructed as described in reference<sup>6</sup>.

### References For Full Methods

1. Khodjakov,A. & Rieder,C.L. The sudden recruitment of  $\gamma$ -tubulin to the centrosome at the onset of mitosis and its dynamic exchange throughout the cell cycle, do not require microtubules. *J. Cell Biol.* **146**, 585-596 (1999).
2. Khodjakov,A., Copenagle,L., Gordon,M.B., Compton,D.A., & Kapoor,T.M. Minus-end capture of preformed kinetochore fibers contributes to spindle morphogenesis . *J. Cell Biol.* **160**, 671-683 (2003).
3. Mayer,T.U. *et al.* Small molecule inhibitor of mitotic spindle bipolarity identified in a phenotype-based screen. *Science* **286**, 971-974 (1999).
4. Khodjakov,A., Cole,R.W., Oakley,B.R., & Rieder,C.L. Centrosome-independent mitotic spindle formation in vertebrates. *Curr. Biol.* **10**, 59-67 (2000).
5. La Terra,S. *et al.* The de novo centriole assembly pathway in HeLa cells: cell cycle progression and centriole assembly/maturation. *J. Cell Biol.* **168**, 713-720 (2005).

6. Khodjakov,A., Cole,R.W., McEwen,B.F., Buttle,K.F., & Rieder,C.L. Chromosome fragments possessing only one kinetochore can congress to the spindle equator. *J. Cell Biol.* **136**, 229-240 (1997).
